# Supplementary material
Source: MDPI journal article supplement (https://www.mdpi.com/search?q=molecules-26-00245)
Supplement: s001 [file molecules-26-00245-s001.pdf]

Supplementary Materials

# Antibacterial Activity and Mechanism of Linalool Against *Shewanella putrefaciens*

Fengyu Guo <sup>1,2,3</sup>, Qiong Liang <sup>1</sup>, Ming Zhang <sup>1</sup>, Wenxue Chen <sup>1,2,3</sup>, Haiming Chen <sup>1,2,3</sup>,  
Yonghuan Yun <sup>1,2,3</sup>, Qiuping Zhong <sup>1,2,3,\*</sup> and Weijun Chen <sup>1,2,3,\*</sup>

<sup>1</sup> College of Food Science and Technology, Hainan University, Haikou 570228, China

<sup>2</sup> Key Laboratory of Food Nutrition and Functional Food of Hainan Province, Haikou 570228, China

<sup>3</sup> Hainan Provincial Engineering Research Center of Aquatic Resources Efficient Utilization in the South China Sea, Haikou 570228, China

\* Correspondence: hainufood88@163.com (Q.Z.), chenwj@nwu.edu.cn (W.C.)

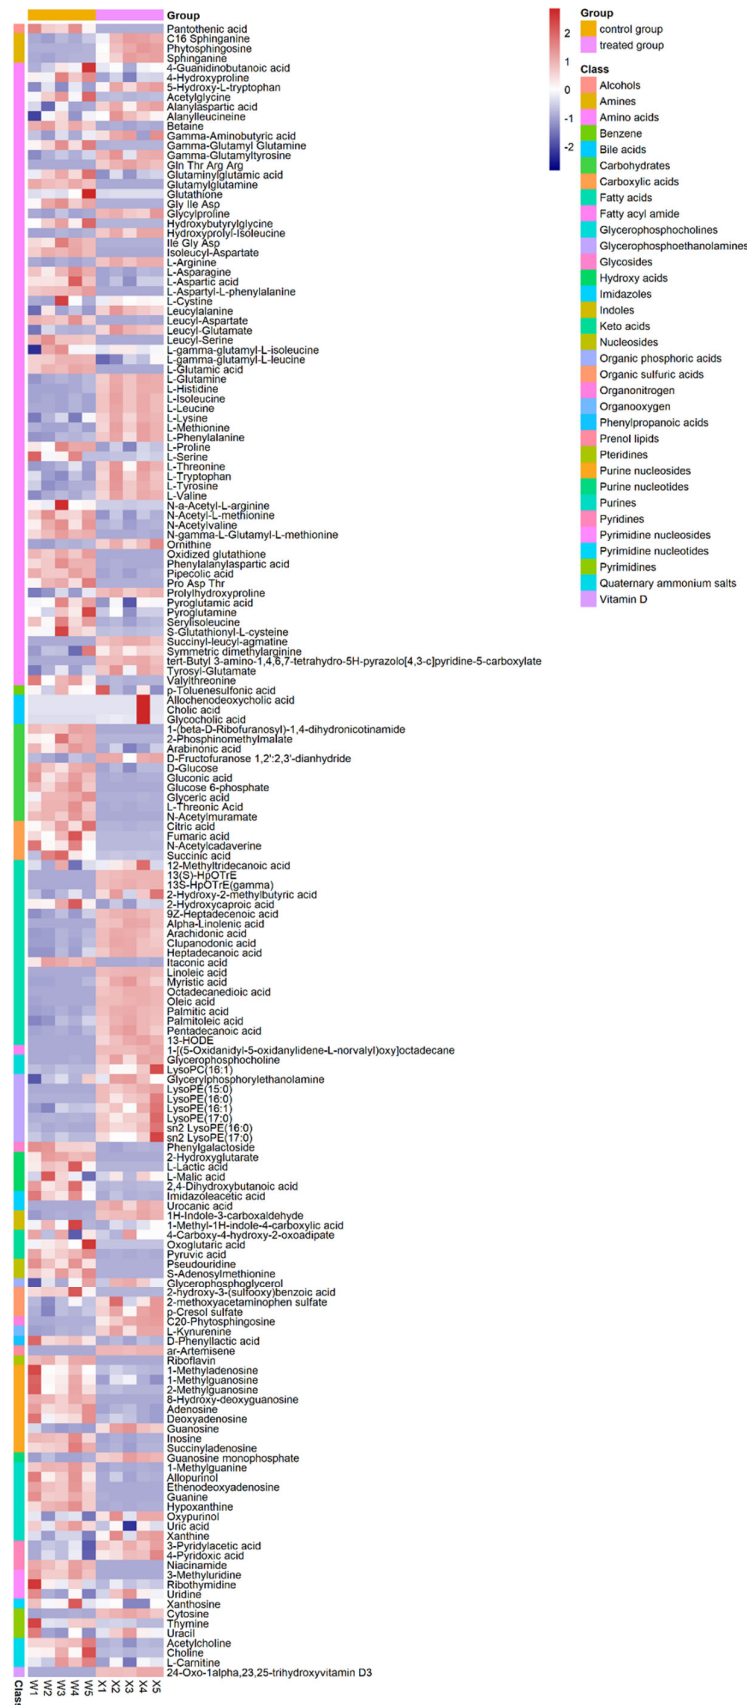

Figure S1
